# Supplementary material
Source: PubMed Central journal article supplement (PMC5824687)
Supplement: NIHMS942586-supplement-supplement_1.pdf [file NIHMS942586-supplement-supplement_1.pdf]

## Appendix

### Supplementary Table

Reported maternal fever, fever severity, and average daily folic acid intake during the periconceptual period\* and risk for neural tube defects after excluding (1) 231 women with pre-existing diabetes, family history of neural tube defect, or periconceptual exposure to antiepileptic drugs, (2) 91 nonisolated cases, and (3) 111 cases with anencephaly or encephalocele, Birth Defects Study, 1998–2015.

| Characteristic                     | Without pre-existing diabetes, family history of neural tube defect, or periconceptual exposure to antiepileptic drugs |                       | Isolated cases only |                       | Spina bifida       |                       |
|------------------------------------|------------------------------------------------------------------------------------------------------------------------|-----------------------|---------------------|-----------------------|--------------------|-----------------------|
|                                    | # Cases/# controls                                                                                                     | Adjusted OR* (95% CI) | # Cases/# controls  | Adjusted OR* (95% CI) | # Cases/# controls | Adjusted OR† (95% CI) |
| Periconceptual fever               |                                                                                                                        |                       |                     |                       |                    |                       |
| Any fever                          | 18/146                                                                                                                 | 2.5 (1.5–4.3)         | 16/154              | 2.7 (1.6–4.7)         | 16/154             | 2.8 (1.6–4.8)         |
| Severity                           |                                                                                                                        |                       |                     |                       |                    |                       |
| Temperature                        |                                                                                                                        |                       |                     |                       |                    |                       |
| ≥101°F                             | 6/58                                                                                                                   | 2.5 (1.0–5.9)         | 5/62                | 2.4 (0.9–6.2)         | 5/62               | 2.4 (0.9–6.2)         |
| <101°F                             | 8/58                                                                                                                   | 3.2 (1.5–7.0)         | 7/62                | 3.4 (1.5–7.6)         | 7/62               | 3.4 (1.5–7.8)         |
| Undocumented                       | 4/30                                                                                                                   |                       | 4/30                |                       | 4/30               |                       |
| No fever during pregnancy          | 329/7898                                                                                                               | Reference             | 268/8093            | Reference             | 264/8093           | Reference             |
| By folic acid status               |                                                                                                                        |                       |                     |                       |                    |                       |
| <400 µg                            |                                                                                                                        |                       |                     |                       |                    |                       |
| Fever during periconceptual period | 11/62                                                                                                                  | 3.4 (1.7–6.6)         | 11/63               | 4.2 (2.1–8.3)         | 10/63              | 4.0 (1.9–8.0)         |
| No fever during pregnancy          | 172/3650                                                                                                               | Reference             | 134/3731            | Reference             | 137/3731           | Reference             |
| Total                              | 183/3712                                                                                                               | —                     | 145/3794            | —                     | 147/3794           | —                     |
| ≥400 µg                            |                                                                                                                        |                       |                     |                       |                    |                       |
| Fever during periconceptual period | 7/82                                                                                                                   | 2.0 (0.9–4.6)         | 5/89                | 1.6 (0.6–4.1)         | 6/89               | 2.1 (0.9–5.0)         |
| No fever during pregnancy          | 143/4046                                                                                                               | Reference             | 125/4158            | Reference             | 115/4158           | Reference             |
| Total                              | 150/4128                                                                                                               | —                     | 130/4247            | —                     | 121/4247           | —                     |

\* Defined as the 28 days before to the 28 days after last menstrual period.

† Adjusted for Study Center.
